# Supplementary material for: The Mapping of Predicted Triplex DNA:RNA in the Drosophila Genome Reveals a Prominent Location in Development- and Morphogenesis-Related Genes
Source: PubMed Central journal article supplement (PMC5499136; doi:10.1534/g3.117.042911), 2017-05-17
Supplement: 2295FileS4.pdf [file 2295FileS4.pdf]

# The mapping of predicted triplex DNA:RNA in the *Drosophila* genome reveals a prominent location in development- and morphogenesis-related genes

**Authors:** Claude Pasquier<sup>1\*</sup>, Sandra Agnel<sup>2</sup>, Alain Robichon<sup>2</sup>

## **Affiliations:**

<sup>1</sup>Université Côte d'Azur, CNRS, I3S, France.

<sup>2</sup>Université Côte d'Azur, INRA, CNRS, ISA, France

\*Correspondence to: [claude.pasquier@unice.fr](mailto:claude.pasquier@unice.fr).

**Supplementary Materials**

**Figure S1: Distribution by length and strand of a panel of TTSs identified on chromosomes.**

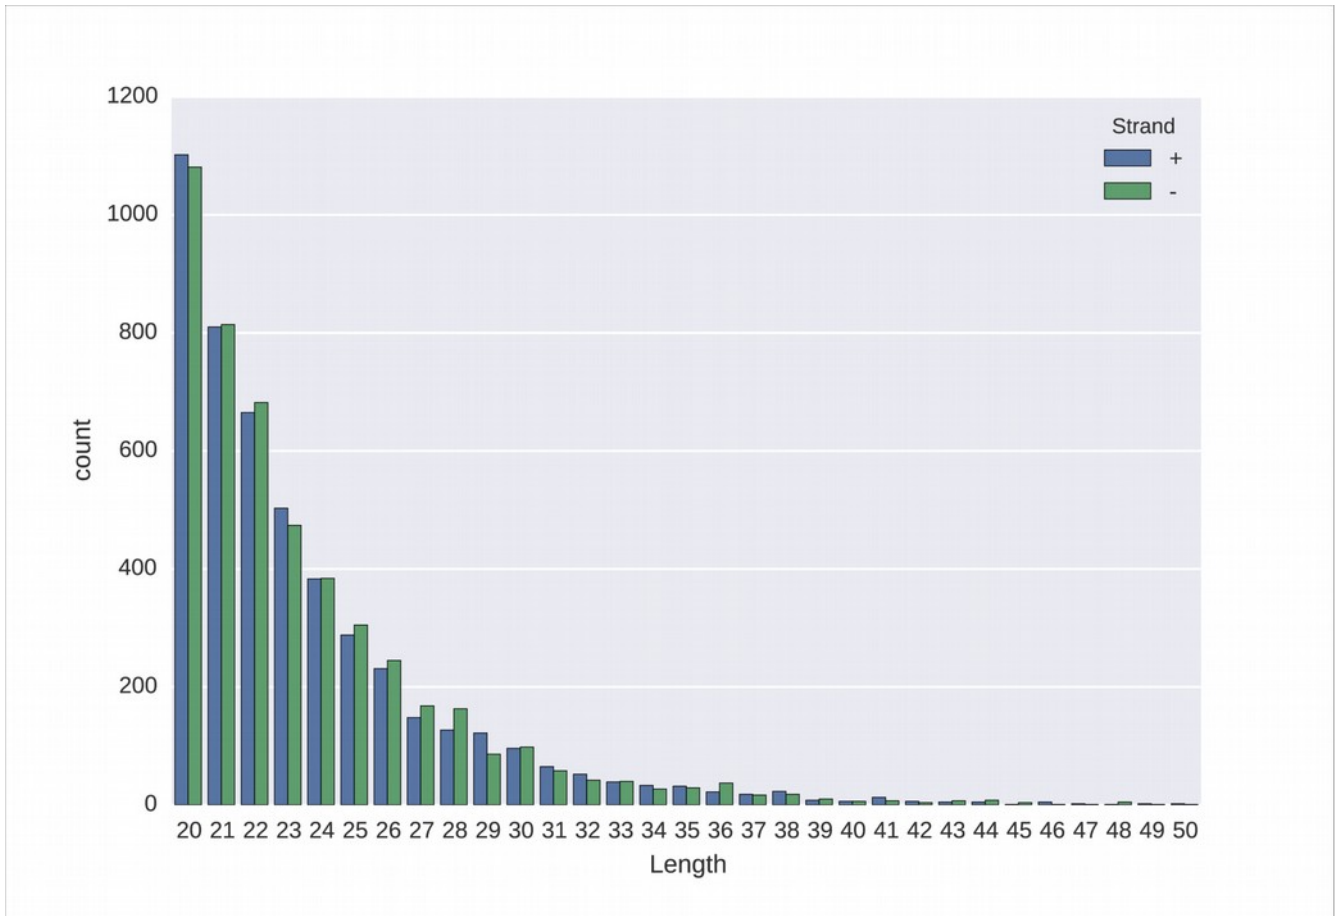

**Distribution of TTSs shorter than 51 bases identified on chromosome. Bars show, for each length, the number of TTSs found on forward (+) and reverse (-) strands.**

**Figure S2: Distribution/localization of putative triplexes on chromosomes formed with TFOs originating from exons.**

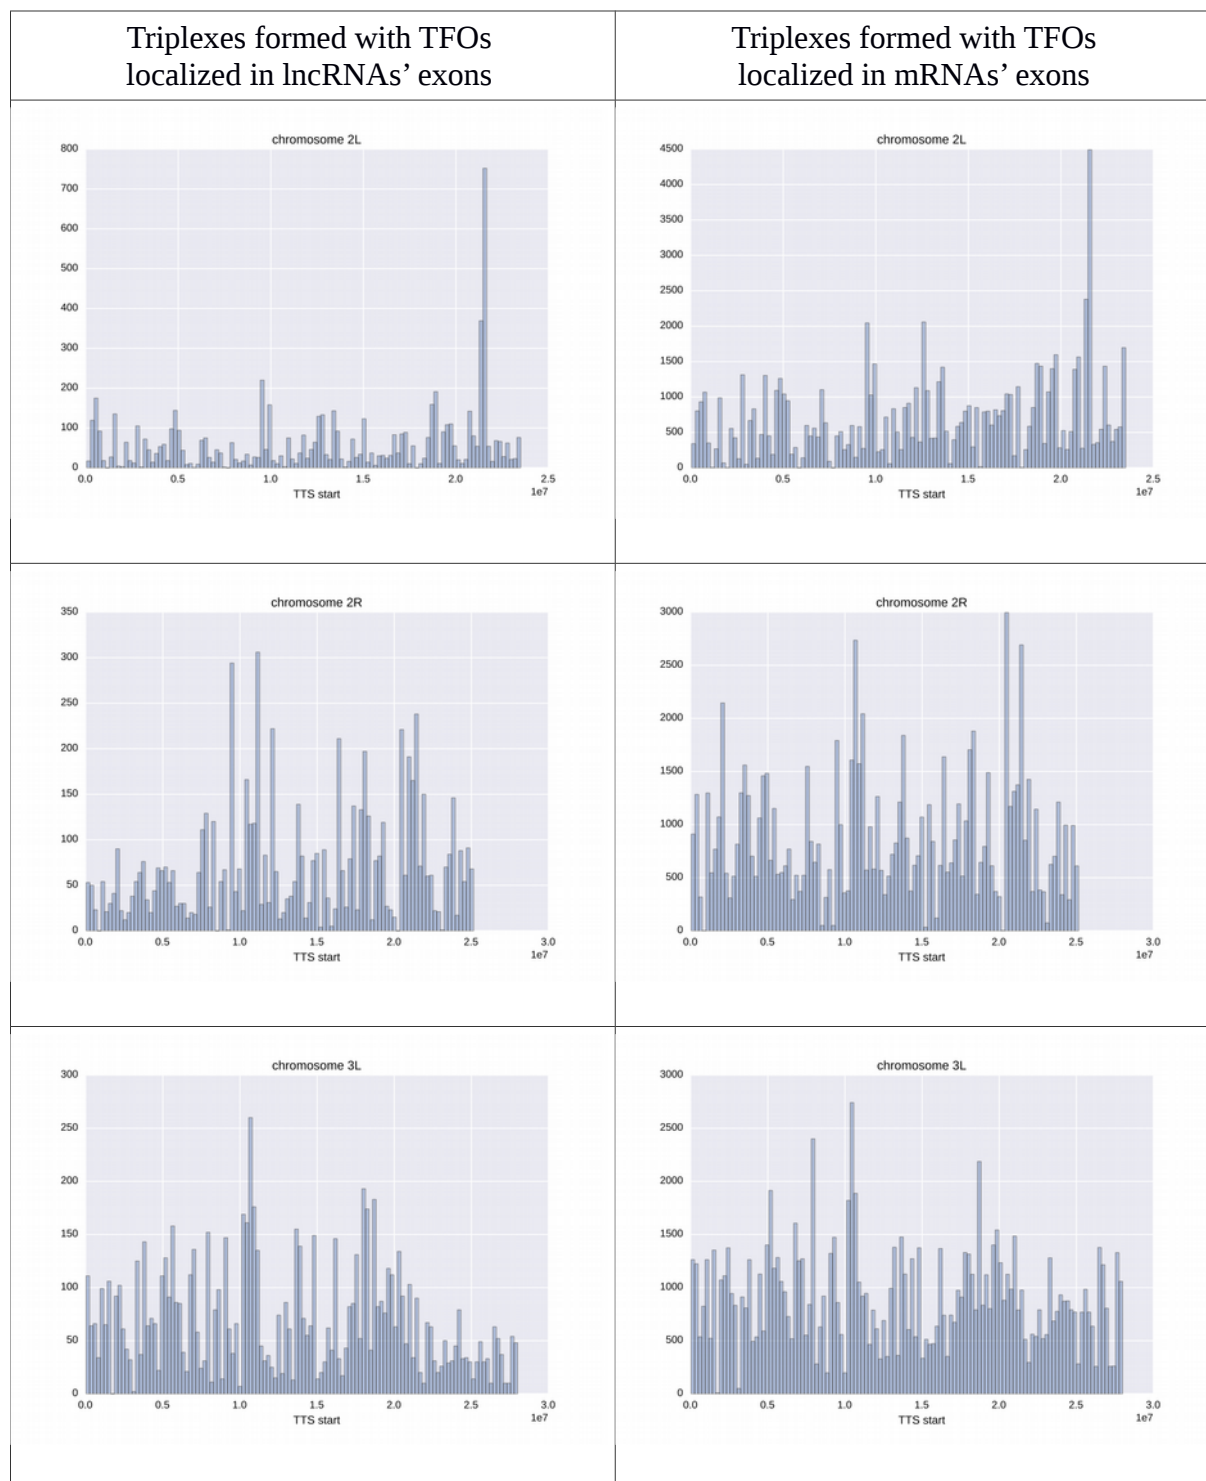

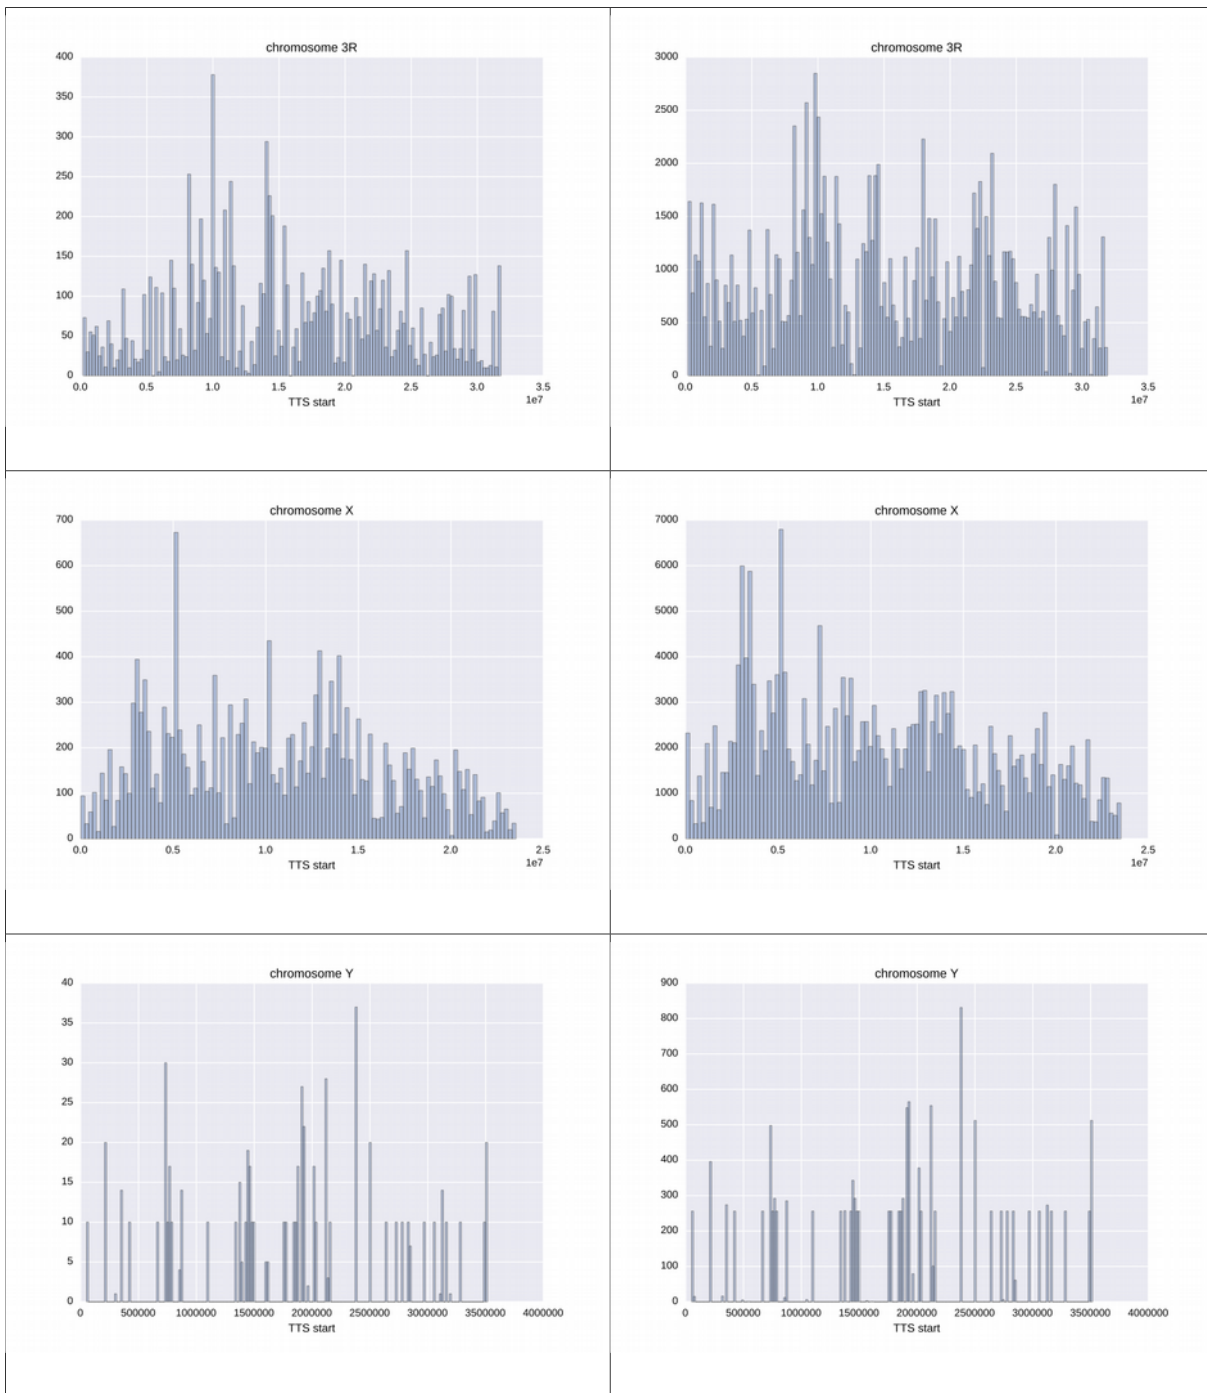

Chromosomes were divided into bins of 200kbp. Each bar on the plots represent the number of triplexes belonging to each bin.

**Figure S3: Distribution/localization of putative triplexes on chromosomes formed with TFOs originating from introns.**

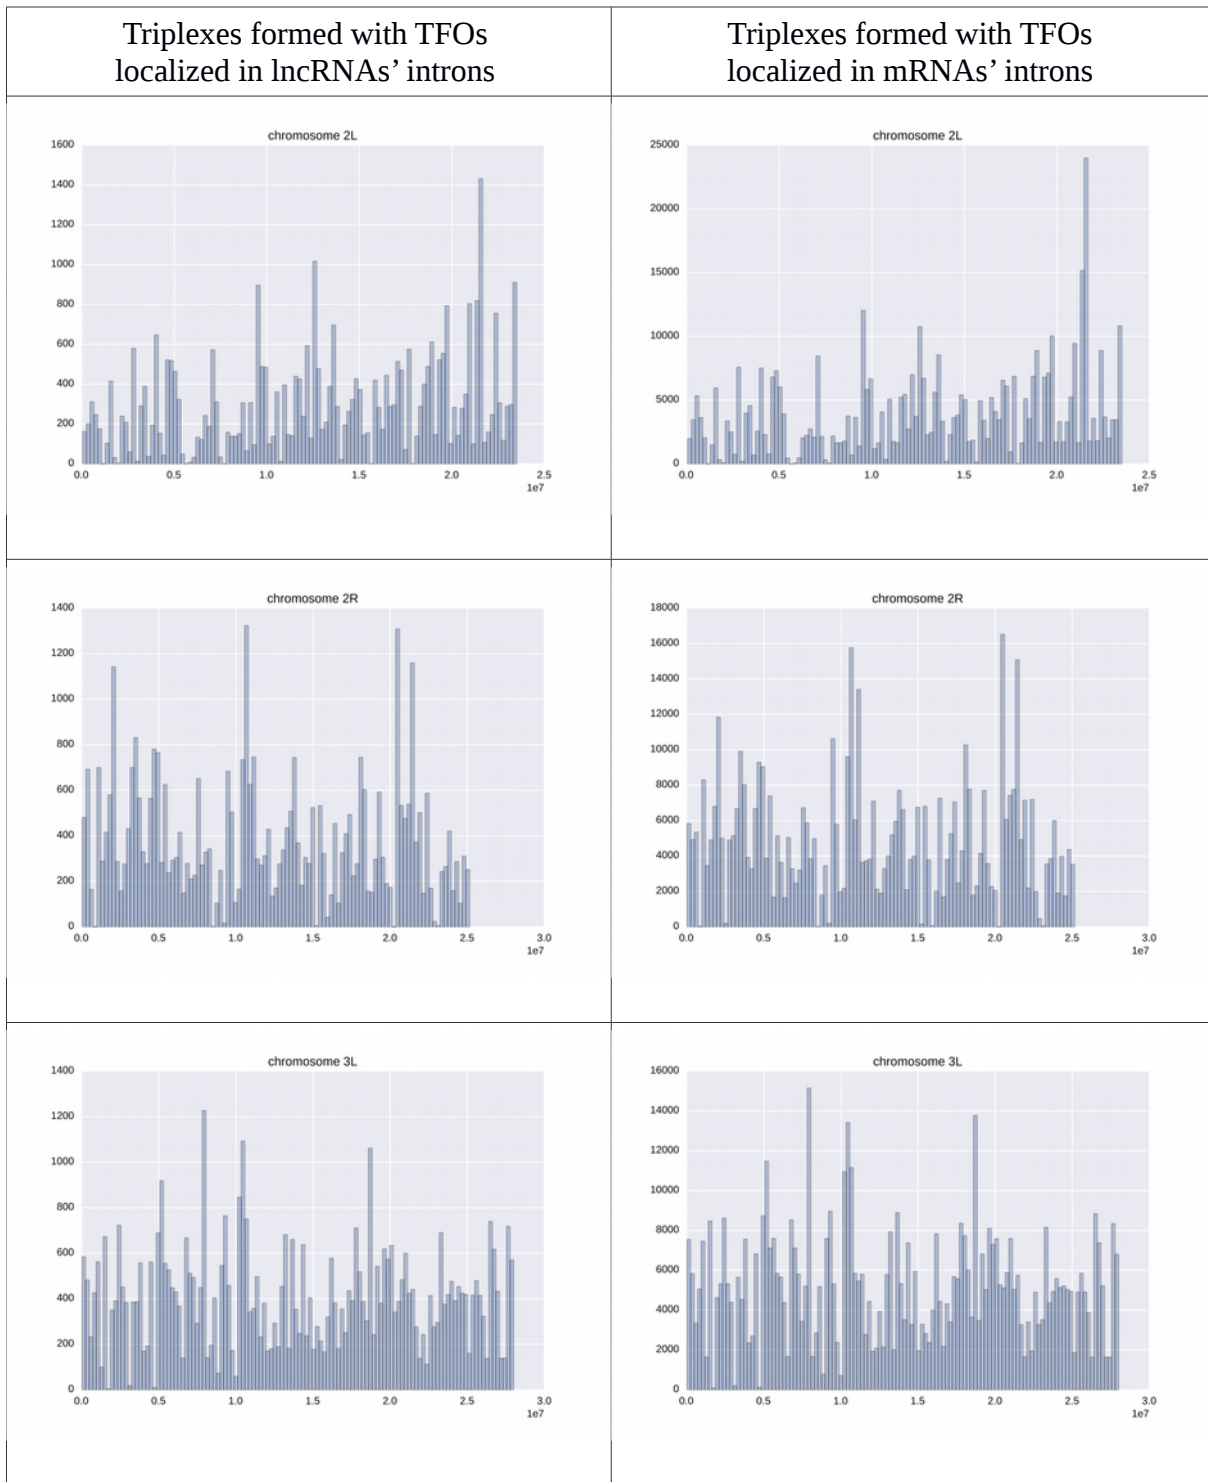

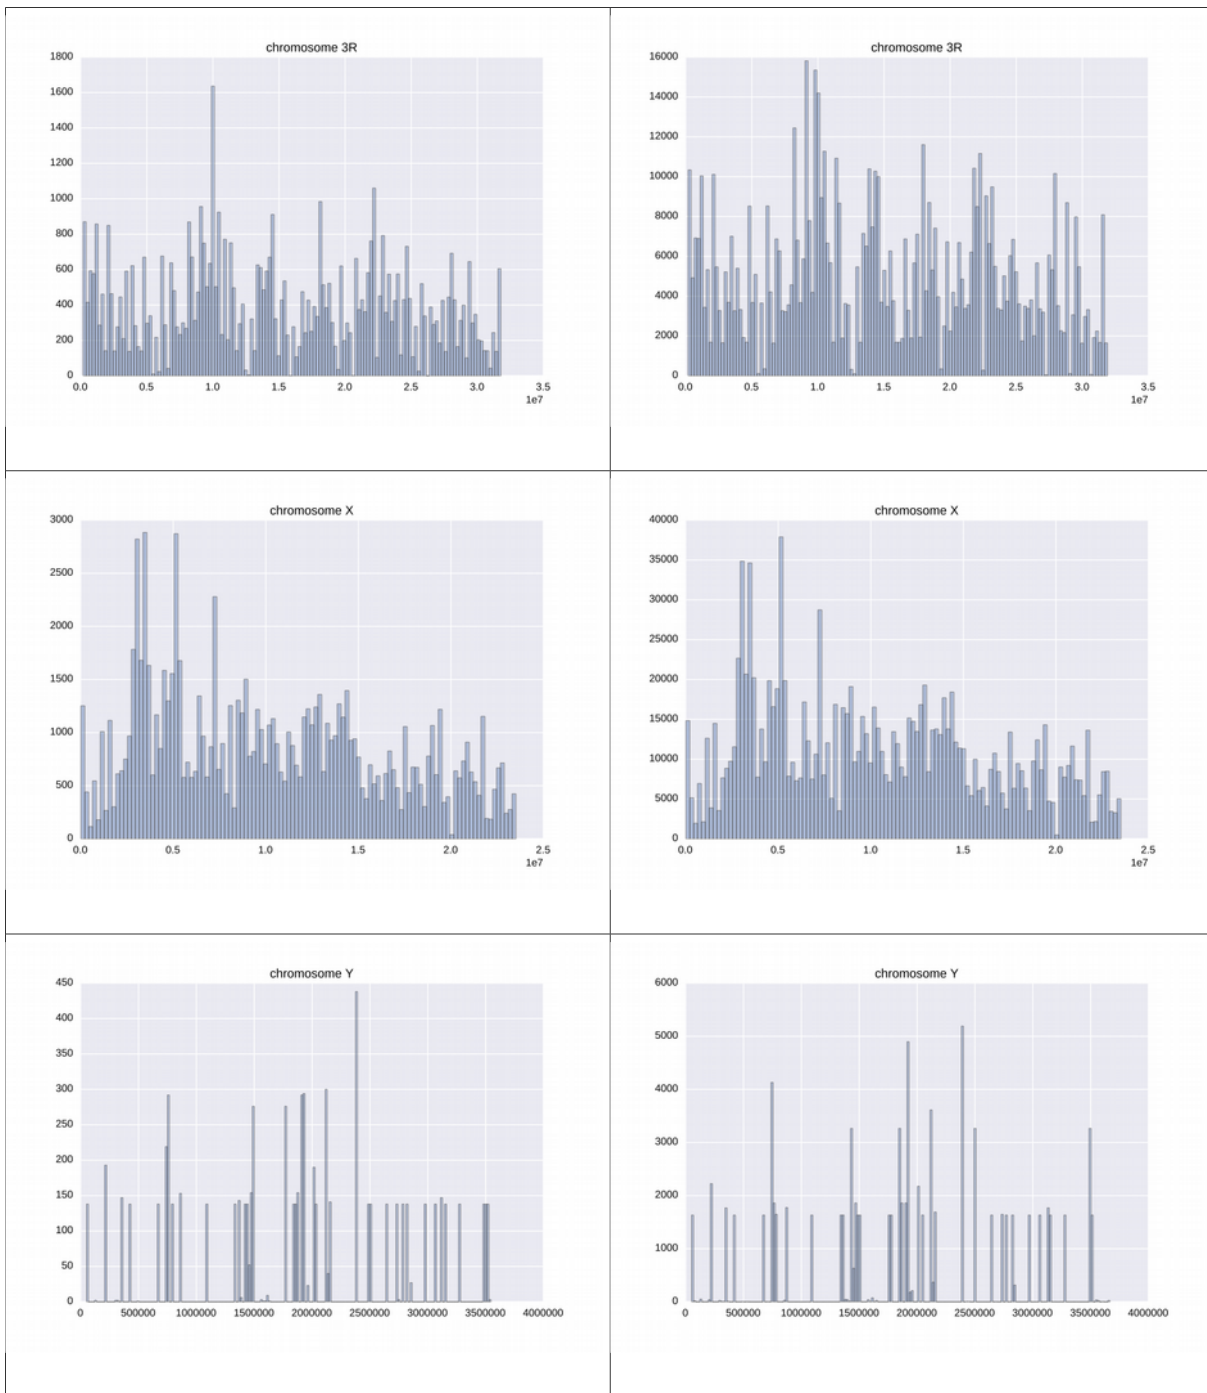

Chromosomes were divided into bins of 200kbp. Each bar on the plots represent the number of triplexes belonging to each bin.

**Table S1: List of genes that include more than 50 TFOs.**

| <b>Gene</b> | <b>Type</b> | <b>number of TFOs</b> |
|-------------|-------------|-----------------------|
| FBgn0028369 | mRNA        | 184                   |
| FBgn0267431 | mRNA        | 153                   |
| FBgn0267001 | mRNA        | 144                   |
| FBgn0029746 | mRNA        | 118                   |
| FBgn0266098 | mRNA        | 118                   |
| FBgn0265457 | ncRNA       | 107                   |
| FBgn0052773 | ncRNA       | 99                    |
| FBgn0267033 | mRNA        | 86                    |
| FBgn0000479 | mRNA        | 83                    |
| FBgn0266350 | ncRNA       | 78                    |
| FBgn0025390 | mRNA        | 78                    |
| FBgn0261260 | mRNA        | 62                    |
| FBgn0261549 | mRNA        | 59                    |
| FBgn0266096 | ncRNA       | 57                    |
| FBgn0264001 | mRNA        | 57                    |
| FBgn0259242 | mRNA        | 56                    |
| FBgn0031016 | mRNA        | 55                    |
| FBgn0003165 | mRNA        | 53                    |
| FBgn0003380 | mRNA        | 53                    |
| FBgn0029939 | mRNA        | 51                    |

269 pre-lncRNAs and 2888 pre-mRNAs contain triplex-forming oligonucleotides patterns (TFO). Most of them include only one TFO but several sequences contain more. The table lists the name and type of the 19 pre-RNA that include more than 50 TFOs.

**Table S2: List of TFOs with a minimum length of 46 bases identified in pre-lncRNAs.**

| <b>lncRNA</b> | <b>TFO start</b> | <b>TFO end</b> | <b>TFO length</b> | <b>Motif</b>      |
|---------------|------------------|----------------|-------------------|-------------------|
| FBgn0261700   | 46               | 92             | 46                | purine            |
| FBgn0263659   | 4773             | 4821           | 48                | purine-pyrimidine |
| FBgn0264675   | 46826            | 46883          | 57                | purine            |
| FBgn0265161   | 590              | 639            | 49                | purine-pyrimidine |
| FBgn0265457   | 95158            | 95209          | 51                | purine-pyrimidine |
| FBgn0266005   | 27019            | 27067          | 48                | purine-pyrimidine |
| FBgn0266199   | 33597            | 33655          | 58                | pyrimidine motif  |

Pre-lncRNAs contain 896 TFOs of length ranging from 20 to 58 ribonucleotides. The table lists the TFOs longer than 40 bases. Columns include the name of the gene including the TFO, the start and end position of the TFO, its length and its motif.



**Table S3: List of TFOs of length > 100 bases identified in pre-mRNAs.**

| <b>mRNA</b> | <b>TFO start</b> | <b>TFO end</b> | <b>TFO length</b> | <b>Motif</b>      |
|-------------|------------------|----------------|-------------------|-------------------|
| FBgn0046323 | 588              | 894            | 310               | pyrimidine        |
| FBgn0046697 | 5561             | 6010           | 450               | pyrimidine        |
| FBgn0264561 | 8871             | 9007           | 140               | purine-pyrimidine |
| FBgn0267430 | 93209            | 93568          | 360               | purine            |
| FBgn0267430 | 229808           | 229976         | 170               | purine            |
| FBgn0267430 | 229977           | 230440         | 460               | purine            |
| FBgn0267433 | 4858             | 5041           | 180               | pyrimidine        |
| FBgn0267433 | 12744            | 13150          | 410               | pyrimidine        |
| FBgn0031273 | 878              | 1082           | 200               | purine            |
| FBgn0031273 | 1146             | 1270           | 120               | purine            |
| FBgn0031273 | 1369             | 1516           | 150               | purine            |
| FBgn0031273 | 1517             | 1684           | 170               | purine            |
| FBgn0031273 | 1692             | 1907           | 220               | purine            |
| FBgn0031273 | 1908             | 2015           | 110               | purine            |
| FBgn0031273 | 2016             | 2137           | 120               | purine            |

12898 TFOs, of length ranging from 20 to 460 bases were identified in pre-mRNAs. The table lists the TFOs longer than 100 bases. Columns include the name of the gene including the TFO, the start and end position of the TFO, its length and its motif.

**Table S4: List of TTSs longer than 100 bases identified on chromosomes.**

| <b>Chromosome</b> | <b>TTS start</b> | <b>TTS end</b> | <b>TTS length</b> | <b>TTS strand</b> |
|-------------------|------------------|----------------|-------------------|-------------------|
| 2L                | 627559           | 627666         | 110               | +                 |
| 2L                | 23513493         | 23513604       | 110               | +                 |
| 2L                | 626797           | 626921         | 120               | +                 |
| 2L                | 627667           | 627788         | 120               | +                 |
| 2L                | 627020           | 627167         | 150               | +                 |
| 2L                | 23512816         | 23512967       | 150               | +                 |
| 2L                | 627168           | 627335         | 170               | +                 |
| 2L                | 626529           | 626733         | 200               | +                 |
| 2L                | 627343           | 627558         | 220               | +                 |
| 2L                | 23513038         | 23513331       | 290               | +                 |
| 2R                | 870230           | 870333         | 100               | +                 |
| 2R                | 748748           | 748931         | 180               | +                 |
| 2R                | 1826283          | 1826691        | 410               | -                 |
| 2R                | 1825696          | 1826183        | 490               | -                 |
| 3R                | 3033606          | 3033774        | 170               | -                 |
| 3R                | 3170014          | 3170373        | 360               | -                 |
| 3R                | 3033142          | 3033605        | 460               | -                 |
| Y                 | 1416903          | 1417060        | 160               | -                 |
| Y                 | 132445           | 132628         | 180               | +                 |
| Y                 | 200694           | 200877         | 180               | +                 |
| Y                 | 203437           | 203742         | 300               | +                 |
| Y                 | 3562332          | 3562638        | 310               | -                 |
| Y                 | 860181           | 860547         | 370               | +                 |
| Y                 | 124336           | 124742         | 410               | +                 |
| Y                 | 1642134          | 1642583        | 450               | -                 |

A search for sequences able to accommodate a third strand identified 9702 triplex-target sites (TTS) along the genome with a length of up to 490 nucleotides. The table lists the TTSs longer than 100 bases. Columns include the name of the chromosome where the TTS is located, the start and end position of the TTS, its length and its strand.

**Table S5: List of genes that include at least 30 TTSs.**

| <b>Gene</b> | <b>Protein coding gene?</b> | <b>number of TSSs</b> |
|-------------|-----------------------------|-----------------------|
| FBgn0028369 | Yes                         | 93                    |
| FBgn0267431 | Yes                         | 79                    |
| FBgn0266098 | Yes                         | 70                    |
| FBgn0029746 | Yes                         | 70                    |
| FBgn0267001 | Yes                         | 65                    |
| FBgn0267033 | Yes                         | 54                    |
| FBgn0265457 | No                          | 54                    |
| FBgn0000479 | Yes                         | 49                    |
| FBgn0052773 | No                          | 47                    |
| FBgn0266350 | No                          | 42                    |
| FBgn0261260 | Yes                         | 33                    |
| FBgn0261549 | Yes                         | 32                    |
| FBgn0000179 | Yes                         | 30                    |
| FBgn0266096 | No                          | 30                    |

The number of TTSs by gene range from 1 to 93. The table lists the genes that contain 30 TTSs or more. Columns include the Id of the gene, its type (coding/non coding) and the number of TTSs identified in the ORF of the gene.

**Table S6: Number of putative triplexes by chromosome depending of the origin of TFOs.**

| <b>Chromosome</b> | <b>Number of putative triplexes obtained from pre-lncRNAs</b> | <b>Number of putative triplexes obtained from pre-mRNAs</b> |
|-------------------|---------------------------------------------------------------|-------------------------------------------------------------|
| X                 | 115359                                                        | 1465700                                                     |
| 2L                | 41251                                                         | 530002                                                      |
| 2R                | 47444                                                         | 607048                                                      |
| 3L                | 58780                                                         | 749403                                                      |
| 3R                | 65829                                                         | 841142                                                      |
| Y                 | 7929                                                          | 100075                                                      |
| 4                 | 1921                                                          | 24338                                                       |

Each chromosome is associated with the numbers of putative triplexes that are obtained by binding its TTSs and the TFOs originating from pre-lncRNAs and pre-mRNAs.

**Table S7: Detail of genes localized near major concentrations of triplexes.**

| <b>Chr.</b> | <b>Region of triplexes high density</b> | <b>Gene name</b>                                                                                                      | <b>Gene type</b>                                                                                                                           | <b>Molecular function</b> | <b>Comment</b>                                                                                                                        |
|-------------|-----------------------------------------|-----------------------------------------------------------------------------------------------------------------------|--------------------------------------------------------------------------------------------------------------------------------------------|---------------------------|---------------------------------------------------------------------------------------------------------------------------------------|
| X           | 5,085,000..5,255,000                    | rugose                                                                                                                | coding                                                                                                                                     | protein kinase A binding  |                                                                                                                                       |
| 2L          | 21,410,000..21,540,000                  | His1<br>His2B<br>His2A<br>His4<br>His3                                                                                | coding<br>coding<br>coding<br>coding<br>coding                                                                                             | DNA binding               | This set of genes is repeated ~20 times in the region. For each group of genes, the triplex concentrations are between His4 and His3. |
| 3L          | 10,323,000..10,368,000                  | CR46006                                                                                                               | non coding                                                                                                                                 |                           |                                                                                                                                       |
| 3L          | 10,772,000..10,826,000                  | CG43245<br>CR44544<br>CR44545<br>CR44546<br>CR46230<br>CR46231<br>CG12523<br>CR44347<br>CG42831<br>CR45247<br>CR45246 | coding<br>non coding<br>non coding<br>non coding<br>non coding<br>non coding<br>coding<br>non coding<br>coding<br>non coding<br>non coding |                           | A number of triplexes are formed in this area outside the ORF of genes                                                                |

The distribution/localization of putative triplexes on chromosomes is not uniformly distributed. Each chromosome contains important hot spots that group a large number of triplexes. The table details 4 of the most remarkable concentrations of triplexes. Each region with a high density of triplexes, was scanned to find the genes included in the zone. The names of the genes, their types and their molecular function are specified.

**Table S8: List of pre-lncRNAs that contribute the most to the formation of triplexes.**

| <b>lncRNA</b> | <b>number of TSS matches</b> |
|---------------|------------------------------|
| FBgn0266350   | 36280                        |
| FBgn0052773   | 34733                        |
| FBgn0265457   | 32808                        |
| FBgn0266096   | 15103                        |
| FBgn0267704   | 14789                        |
| FBgn0266180   | 9659                         |
| FBgn0264384   | 9144                         |
| FBgn0264675   | 7288                         |
| FBgn0266199   | 7284                         |
| FBgn0264678   | 5508                         |
| FBgn0267668   | 5452                         |
| FBgn0266348   | 4838                         |
| FBgn0266214   | 4186                         |
| FBgn0266376   | 3350                         |
| FBgn0051781   | 3345                         |
| FBgn0265663   | 3260                         |
| FBgn0266046   | 3189                         |
| FBgn0047205   | 3114                         |
| FBgn0266886   | 3114                         |
| FBgn0266005   | 2128                         |
| FBgn0267601   | 2026                         |
| FBgn0266313   | 1895                         |
| FBgn0263659   | 1819                         |
| FBgn0051386   | 1626                         |
| FBgn0266751   | 1106                         |
| FBgn0266851   | 1085                         |
| FBgn0267307   | 1038                         |
| FBgn0264842   | 1038                         |
| FBgn0262741   | 1038                         |
| FBgn0267229   | 1032                         |

192 pre-lncRNAs contain TFOs that bind TTSs identified on the genome. The table lists the 30 lncRNAs that bind the largest number of TTSs.

**Table S9: List of pre-mRNAs that contribute the most to the formation of triplexes.**

| <b>mRNAs</b> | <b>number of TSS matches</b> |
|--------------|------------------------------|
| FBgn0028369  | 74500                        |
| FBgn0267431  | 64820                        |
| FBgn0267001  | 48448                        |
| FBgn0266098  | 39466                        |
| FBgn0029746  | 39466                        |
| FBgn0259242  | 24314                        |
| FBgn0029939  | 24290                        |
| FBgn0267336  | 20069                        |
| FBgn0263780  | 20053                        |
| FBgn0000479  | 19992                        |
| FBgn0003165  | 19867                        |
| FBgn0000464  | 19004                        |
| FBgn0025390  | 18756                        |
| FBgn0052423  | 17684                        |
| FBgn0052791  | 17661                        |
| FBgn0267964  | 16857                        |
| FBgn0085387  | 16519                        |
| FBgn0085443  | 16212                        |
| FBgn0052600  | 16134                        |
| FBgn0267430  | 16106                        |
| FBgn0000179  | 15871                        |
| FBgn0264001  | 15102                        |
| FBgn0051163  | 14883                        |
| FBgn0040765  | 14840                        |
| FBgn0029657  | 14748                        |
| FBgn0031016  | 14178                        |
| FBgn0266429  | 13661                        |
| FBgn0001235  | 13044                        |
| FBgn0000114  | 13024                        |
| FBgn0267429  | 12883                        |

2255 pre-mRNAs contain TFOs that bind TTSs identified on the genome. The table lists the 30 mRNAs that bind the largest number of TTSs.

**Table S10: Enrichment analysis with GO Biological Process of pre-mRNAs that mostly contributes to the formation of triplexes.**

| <b>GO Biological process</b>                               | <b>P-value</b> |
|------------------------------------------------------------|----------------|
| animal organ morphogenesis (GO:0009887)                    | 3.75E-40       |
| anatomical structure morphogenesis (GO:0009653)            | 1.32E-37       |
| single-multicellular organism process (GO:0044707)         | 1.99E-36       |
| biological regulation (GO:0065007)                         | 2.17E-36       |
| system development (GO:0048731)                            | 1.84E-35       |
| regulation of cellular process (GO:0050794)                | 4.16E-35       |
| animal organ development (GO:0048513)                      | 5.89E-35       |
| regulation of biological process (GO:0050789)              | 6.36E-35       |
| appendage morphogenesis (GO:0035107)                       | 4.28E-33       |
| post-embryonic appendage morphogenesis (GO:0035120)        | 7.88E-33       |
| appendage development (GO:0048736)                         | 1.21E-32       |
| tissue morphogenesis (GO:0048729)                          | 1.81E-32       |
| imaginal disc-derived appendage morphogenesis (GO:0035114) | 2.25E-32       |
| morphogenesis of an epithelium (GO:0002009)                | 2.56E-32       |
| post-embryonic animal organ development (GO:0048569)       | 3.48E-32       |
| imaginal disc-derived appendage development (GO:0048737)   | 4.69E-32       |
| post-embryonic animal organ morphogenesis (GO:0048563)     | 1.88E-31       |
| imaginal disc morphogenesis (GO:0007560)                   | 1.88E-31       |
| epithelial tube morphogenesis (GO:0060562)                 | 5.64E-30       |
| single-organism process (GO:0044699)                       | 7.88E-30       |
| multicellular organismal process (GO:0032501)              | 1.73E-29       |
| multicellular organism development (GO:0007275)            | 1.77E-29       |
| tube development (GO:0035295)                              | 2.19E-29       |
| imaginal disc development (GO:0007444)                     | 2.71E-29       |
| developmental process (GO:0032502)                         | 3.12E-29       |
| tube morphogenesis (GO:0035239)                            | 3.38E-29       |
| single-organism developmental process (GO:0044767)         | 3.88E-29       |
| epithelium development (GO:0060429)                        | 6.36E-29       |
| instar larval or pupal morphogenesis (GO:0048707)          | 8.93E-29       |
| anatomical structure development (GO:0048856)              | 9.37E-29       |
| tissue development (GO:0009888)                            | 1.51E-28       |
| metamorphosis (GO:0007552)                                 | 2.20E-28       |
| post-embryonic development (GO:0009791)                    | 2.79E-28       |
| post-embryonic animal morphogenesis (GO:0009886)           | 3.37E-28       |
| instar larval or pupal development (GO:0002165)            | 1.77E-26       |
| imaginal disc-derived wing morphogenesis (GO:0007476)      | 4.95E-26       |

A limited number of pre-mRNAs contribute to the formation of a majority of triplexes. We selected, for Gene Ontology enrichment analysis with Biological Process, 381 transcripts that contributes to the formation of more than 75% of triplexes with a density of TFO-TSS matches above average. The table lists only annotations obtained with a p-value < 1E-25.



**Table S11: Enrichment analysis with GO Molecular Functions of pre-mRNAs that mostly contributes to the formation of triplexes.**

| <b>GO Molecular Function</b>                                    | <b>P-value</b> |
|-----------------------------------------------------------------|----------------|
| protein binding (GO:0005515)                                    | 7.31E-09       |
| binding (GO:0005488)                                            | 1.36E-08       |
| signal transducer activity (GO:0004871)                         | 9.78E-08       |
| receptor activity (GO:0004872)                                  | 4.44E-07       |
| molecular transducer activity (GO:0060089)                      | 4.44E-07       |
| signaling receptor activity (GO:0038023)                        | 2.12E-06       |
| nucleic acid binding transcription factor activity (GO:0001071) | 2.22E-04       |
| transcription factor activity                                   | 2.22E-04       |
| sequence-specific DNA binding (GO:0043565)                      | 1.68E-03       |
| cyclic-nucleotide phosphodiesterase activity (GO:0004112)       | 2.30E-03       |
| transmembrane signaling receptor activity (GO:0004888)          | 6.13E-03       |
| transmembrane receptor activity (GO:0099600)                    | 1.05E-02       |
| transcription regulatory region DNA binding (GO:0044212)        | 1.27E-02       |
| regulatory region nucleic acid binding (GO:0001067)             | 1.39E-02       |
| regulatory region DNA binding (GO:0000975)                      | 1.39E-02       |
| potassium ion transmembrane transporter activity (GO:0015079)   | 2.74E-02       |
| peptide receptor activity (GO:0001653)                          | 3.18E-02       |
| G-protein coupled receptor activity (GO:0004930)                | 4.98E-02       |

A limited number of pre-mRNAs contribute to the formation of a majority of triplexes. We selected, for Gene Ontology enrichment analysis with Molecular Function, 381 transcripts that contributes to the formation of more than 75% of triplexes with a density of TFO-TSS matches above average. The table lists all annotations obtained with a p-value < 1E-01.

**Table S12: List of genes the most targeted by pre-lncRNA TFOs.**

| <b>Gene</b> | <b>Number of TFO matches</b> |
|-------------|------------------------------|
| FBgn0028369 | 4871                         |
| FBgn0267431 | 4577                         |
| FBgn0029746 | 3114                         |
| FBgn0266098 | 3114                         |
| FBgn0267001 | 2570                         |
| FBgn0266350 | 2544                         |
| FBgn0052773 | 2524                         |
| FBgn0265457 | 2496                         |
| FBgn0000479 | 1904                         |
| FBgn0267336 | 1719                         |
| FBgn0266096 | 1718                         |
| FBgn0029939 | 1627                         |
| FBgn0003165 | 1444                         |
| FBgn0261260 | 1345                         |
| FBgn0052600 | 1302                         |
| FBgn0267033 | 1262                         |
| FBgn0000179 | 1254                         |
| FBgn0261549 | 1239                         |
| FBgn0259242 | 1237                         |
| FBgn0263780 | 1232                         |
| FBgn0000464 | 1230                         |
| FBgn0085387 | 1136                         |
| FBgn0025390 | 1135                         |
| FBgn0267964 | 1082                         |
| FBgn0040765 | 1044                         |
| FBgn0052423 | 1043                         |
| FBgn0051163 | 1040                         |
| FBgn0029657 | 1020                         |
| FBgn0031016 | 1014                         |
| FBgn0267429 | 968                          |

1542 genes contain TTSs that are targeted by pre-lncRNA TFOs. The table lists the 30 genes the most targeted with the number of matches.

**Table S13: list of genes the most targeted by pre-mRNA TFOs.**

| <b>Gene</b> | <b>Number of TFO matches</b> |
|-------------|------------------------------|
| FBgn0028369 | 61911                        |
| FBgn0267431 | 57945                        |
| FBgn0029746 | 39287                        |
| FBgn0266098 | 39287                        |
| FBgn0267001 | 32413                        |
| FBgn0266350 | 31828                        |
| FBgn0265457 | 31602                        |
| FBgn0052773 | 31415                        |
| FBgn0000479 | 24052                        |
| FBgn0267336 | 21933                        |
| FBgn0266096 | 21534                        |
| FBgn0029939 | 20644                        |
| FBgn0003165 | 18385                        |
| FBgn0261260 | 16823                        |
| FBgn0052600 | 16693                        |
| FBgn0267033 | 15689                        |
| FBgn0263780 | 15614                        |
| FBgn0000464 | 15602                        |
| FBgn0261549 | 15504                        |
| FBgn0259242 | 15455                        |
| FBgn0000179 | 15385                        |
| FBgn0085387 | 14702                        |
| FBgn0025390 | 14624                        |
| FBgn0267964 | 13714                        |
| FBgn0052423 | 13328                        |
| FBgn0040765 | 13175                        |
| FBgn0051163 | 12993                        |
| FBgn0029657 | 12726                        |
| FBgn0265416 | 12713                        |
| FBgn0031016 | 12472                        |

1914 genes contain TTSs that are targeted by pre-mRNA TFOs. The table lists the 30 genes the most targeted with the number of matches .

**Table S14: Enrichment analysis with GO Biological Process of the genes the most targeted by pre-lncRNA TFOs.**

| <b>GO Biological process</b>                                     | <b>P-value</b> |
|------------------------------------------------------------------|----------------|
| nucleosome assembly (GO:0006334)                                 | 3.23E-37       |
| nucleosome organization (GO:0034728)                             | 1.52E-36       |
| DNA-templated transcription                                      | 1.93E-36       |
| chromatin assembly (GO:0031497)                                  | 1.93E-36       |
| protein-DNA complex assembly (GO:0065004)                        | 8.08E-36       |
| protein-DNA complex subunit organization (GO:0071824)            | 7.40E-35       |
| chromatin assembly or disassembly (GO:0006333)                   | 4.57E-34       |
| DNA packaging (GO:0006323)                                       | 6.90E-34       |
| DNA conformation change (GO:0071103)                             | 3.38E-33       |
| nucleic acid-templated transcription (GO:0097659)                | 2.19E-29       |
| transcription                                                    | 2.19E-29       |
| RNA biosynthetic process (GO:0032774)                            | 3.17E-29       |
| cellular macromolecular complex assembly (GO:0034622)            | 3.20E-28       |
| macromolecular complex assembly (GO:0065003)                     | 8.85E-27       |
| macromolecular complex subunit organization (GO:0043933)         | 3.84E-26       |
| chromatin organization (GO:0006325)                              | 6.70E-24       |
| nucleobase-containing compound biosynthetic process (GO:0034654) | 7.32E-24       |
| aromatic compound biosynthetic process (GO:0019438)              | 2.92E-22       |
| heterocycle biosynthetic process (GO:0018130)                    | 6.74E-22       |
| organic cyclic compound biosynthetic process (GO:1901362)        | 2.95E-21       |
| RNA metabolic process (GO:0016070)                               | 8.26E-21       |
| chromosome organization (GO:0051276)                             | 4.37E-20       |
| cellular component assembly (GO:0022607)                         | 2.23E-19       |
| cellular component biogenesis (GO:0044085)                       | 1.85E-18       |
| nucleic acid metabolic process (GO:0090304)                      | 1.06E-17       |
| cellular nitrogen compound biosynthetic process (GO:0044271)     | 1.20E-16       |
| cellular macromolecule biosynthetic process (GO:0034645)         | 2.60E-16       |
| gene expression (GO:0010467)                                     | 2.69E-16       |
| macromolecule biosynthetic process (GO:0009059)                  | 5.66E-16       |
| nucleobase-containing compound metabolic process (GO:0006139)    | 1.55E-14       |
| heterocycle metabolic process (GO:0046483)                       | 6.81E-14       |
| cellular aromatic compound metabolic process (GO:0006725)        | 1.56E-13       |
| organic cyclic compound metabolic process (GO:1901360)           | 4.06E-13       |
| cellular biosynthetic process (GO:0044249)                       | 4.16E-12       |
| organic substance biosynthetic process (GO:1901576)              | 6.05E-12       |
| cellular nitrogen compound metabolic process (GO:0034641)        | 1.25E-11       |
| biosynthetic process (GO:0009058)                                | 1.41E-11       |

A limited number of genes concentrate most of the triplexes. We used, for Gene Ontology enrichment analysis, the 35 genes targeted by pre-lncRNA TFOs that account for 75% of the total number of triplexes and that group a count of TFO-TSS matches per 1000 bases above average. The table lists the most representative annotations up to a p-value of 1E-10).

**Table S15: Enrichment analysis with GO Biological Process of the genes the most targeted by pre-mRNA TFOs.**

| <b>GO Biological process</b>                               | <b>P-value</b> |
|------------------------------------------------------------|----------------|
| regulation of cellular process (GO:0050794)                | 1.14E-42       |
| animal organ morphogenesis (GO:0009887)                    | 8.00E-42       |
| regulation of biological process (GO:0050789)              | 1.29E-41       |
| single-multicellular organism process (GO:0044707)         | 3.22E-41       |
| anatomical structure morphogenesis (GO:0009653)            | 5.45E-41       |
| biological regulation (GO:0065007)                         | 3.55E-40       |
| system development (GO:0048731)                            | 1.19E-39       |
| animal organ development (GO:0048513)                      | 2.79E-37       |
| single-organism developmental process (GO:0044767)         | 7.92E-35       |
| developmental process (GO:0032502)                         | 2.79E-34       |
| multicellular organism development (GO:0007275)            | 1.26E-33       |
| tissue morphogenesis (GO:0048729)                          | 4.02E-33       |
| morphogenesis of an epithelium (GO:0002009)                | 4.64E-33       |
| anatomical structure development (GO:0048856)              | 5.62E-32       |
| cell differentiation (GO:0030154)                          | 4.08E-31       |
| epithelial tube morphogenesis (GO:0060562)                 | 9.54E-31       |
| tube morphogenesis (GO:0035239)                            | 1.37E-30       |
| post-embryonic animal organ development (GO:0048569)       | 1.66E-30       |
| cellular developmental process (GO:0048869)                | 2.36E-30       |
| multicellular organismal process (GO:0032501)              | 2.41E-30       |
| appendage development (GO:0048736)                         | 7.12E-30       |
| single-organism process (GO:0044699)                       | 1.04E-29       |
| tube development (GO:0035295)                              | 1.25E-29       |
| post-embryonic animal organ morphogenesis (GO:0048563)     | 2.40E-29       |
| imaginal disc morphogenesis (GO:0007560)                   | 2.40E-29       |
| generation of neurons (GO:0048699)                         | 9.85E-29       |
| appendage morphogenesis (GO:0035107)                       | 1.21E-28       |
| imaginal disc-derived appendage development (GO:0048737)   | 1.62E-28       |
| post-embryonic appendage morphogenesis (GO:0035120)        | 1.92E-28       |
| imaginal disc-derived appendage morphogenesis (GO:0035114) | 5.32E-28       |
| cell development (GO:0048468)                              | 8.89E-28       |
| epithelium development (GO:0060429)                        | 2.21E-27       |
| imaginal disc development (GO:0007444)                     | 2.61E-27       |
| instar larval or pupal morphogenesis (GO:0048707)          | 3.67E-27       |
| post-embryonic development (GO:0009791)                    | 1.10E-26       |
| metamorphosis (GO:0007552)                                 | 1.11E-26       |
| response to chemical (GO:0042221)                          | 1.15E-26       |
| post-embryonic animal morphogenesis (GO:0009886)           | 1.44E-26       |
| behavior (GO:0007610)                                      | 2.81E-26       |
| tissue development (GO:0009888)                            | 3.83E-26       |
| cellular component organization (GO:0016043)               | 4.93E-26       |

We used, for GO enrichment analysis, the 447 genes targeted by pre-mRNA TFOs that account for 75% of the total number of triplexes and that group a count of TFO-TSS matches per 1000 bases above average. The table lists the most representative annotations up to a p-value of 1E-25).

**Table S16: Enrichment analysis with GO Molecular Function of the genes the most targeted by TFOs.**

| GO Molecular Function                                           | P-value                  |                            |
|-----------------------------------------------------------------|--------------------------|----------------------------|
|                                                                 | Targets of pre-mRNA TFOs | Targets of pre-lncRNA TFOs |
| protein binding (GO:0005515)                                    | 5.57E-22                 | 3.14E-10                   |
| binding (GO:0005488)                                            | 8.98E-19                 | 1.57E-04                   |
| DNA binding (GO:0003677)                                        | 2.92E-18                 | 6.91E-17                   |
| protein dimerization activity (GO:0046983)                      | 1.36E-17                 | 1.82E-24                   |
| histone binding (GO:0042393)                                    | 3.77E-17                 | 2.84E-41                   |
| nucleic acid binding transcription factor activity (GO:0001071) | 1.19E-12                 |                            |
| transcription factor activity                                   | 1.19E-12                 |                            |
| protein heterodimerization activity (GO:0046982)                | 1.55E-12                 | 2.06E-28                   |
| nucleic acid binding (GO:0003676)                               | 2.75E-12                 | 2.68E-14                   |
| sequence-specific DNA binding (GO:0043565)                      | 1.25E-11                 |                            |
| heterocyclic compound binding (GO:1901363)                      | 3.71E-10                 | 1.14E-11                   |
| organic cyclic compound binding (GO:0097159)                    | 5.46E-10                 | 1.33E-11                   |
| signal transducer activity (GO:0004871)                         | 6.10E-08                 |                            |
| receptor activity (GO:0004872)                                  | 1.03E-06                 |                            |
| molecular transducer activity (GO:0060089)                      | 1.03E-06                 |                            |
| signaling receptor activity (GO:0038023)                        | 7.60E-06                 |                            |
| transcription regulatory region DNA binding (GO:0044212)        | 6.80E-04                 |                            |
| regulatory region nucleic acid binding (GO:0001067)             | 7.58E-04                 |                            |
| regulatory region DNA binding (GO:0000975)                      | 7.58E-04                 |                            |
| protein homodimerization activity (GO:0042803)                  | 1.74E-03                 |                            |
| passive transmembrane transporter activity (GO:0022803)         | 1.98E-03                 |                            |
| channel activity (GO:0015267)                                   | 1.98E-03                 |                            |
| Rho guanyl-nucleotide exchange factor activity (GO:0005089)     | 2.41E-03                 |                            |
| substrate-specific channel activity (GO:0022838)                | 2.84E-03                 |                            |
| identical protein binding (GO:0042802)                          | 5.37E-03                 |                            |
| cation channel activity (GO:0005261)                            | 7.12E-03                 |                            |
| RNA polymerase II transcription factor activity                 | 9.05E-03                 |                            |
| ion channel activity (GO:0005216)                               | 9.23E-03                 |                            |
| transmembrane signaling receptor activity (GO:0004888)          | 9.85E-03                 |                            |

A limited number of genes concentrate most of the triplexes. We selected the genes targeted by TFOs that account for 75% of the total number of triplexes and that group a count of TFO-TSS matches per 1000 bases above average. This represents 35 genes targeted by pre-lncRNA TFOs and 447 genes targeted by pre-mRNA TFOs. Enrichment analyses with GO Molecular Function, performed on these two sets of genes, produced two lists of overrepresented annotations. The table lists the most representative annotations for genes targeted by pre-mRNA TFOs (up to a p-value of 1E-2) and displays the p-value scored by enrichment analysis of the list of genes targeted by pre-lncRNA TFOs. Empty cells in the column corresponding to pre-lncRNA TFOs indicate that the enrichment of the corresponding annotation is associated with a bad p-value > 1E-2.

**Table S17: Distribution of TSSs and triplex matches on the genome with an allowed error rate of 5 %.**

|         | TTS    |         | lncRNA    |         | mRNA       |         |
|---------|--------|---------|-----------|---------|------------|---------|
|         | number | %       | number    | %       | number     | %       |
| genome  | 40,086 | 100.00% | 3,083,421 | 100.00% | 38,759,372 | 100.00% |
|         |        |         |           |         |            |         |
| genes   | 30,568 | 76.25%  | 2,371,720 | 76.91%  | 29,716,660 | 76.66%  |
| introns | 22,719 | 56.67%  | 1,994,533 | 64.68%  | 25,408,195 | 65.55%  |
| exons   | 7,849  | 19.58%  | 377,187   | 12.23%  | 4,308,465  | 11.11%  |

**Table S18: Quantification of compatible triplex sequences found in the DNA pull down obtained with the triplex biotinyl probe (TO-biotin).**

| Matching method | Minimal length of triplex | Number of sequences |
|-----------------|---------------------------|---------------------|
| Perfect match   | 56                        | 1                   |
|                 | 24                        | 2                   |
|                 | 14                        | 5                   |
|                 | 13                        | 24                  |
|                 | 12                        | 25                  |
|                 | 11                        | 30                  |
|                 | 10                        | 93                  |
| 10% mismatches  | 93                        | 1                   |
|                 | 34                        | 2                   |
|                 | 22                        | 3                   |
|                 | 21                        | 17                  |
|                 | 20                        | 30                  |
|                 | 16                        | 33                  |
|                 | 15                        | 56                  |
|                 | 14                        | 60                  |
|                 | 13                        | 63                  |
|                 | 12                        | 96                  |
|                 | 11                        | 100                 |
|                 | 10                        | 100                 |

The DNA fragments recovered from the pull down obtained with TO biotin were analyzed for the presence of triplex compatible sequences. The minimal length for triplex structure is 9 bases. The analysis was performed with a minimal 10 bases length up to 56 for perfect triplex and 93 when 10% mistakes were included.



**File S1: Complete versions of data listed in Tables S8-S9 and S12-S13.**

**File S2: Complete versions of data listed in Tables S10-S11 and complete GO annotations used to build Tables S14-S16.**

**File S3: Data associated with Figure 3.**

List of genes on the graph, composition of each cluster, GO enrichments obtained for the whole graph and the 3 identified clusters.
